# Supplementary material
Source: publisher figshare collection journal article supplement (https://future-science-group.figshare.com/ndownloader/files/24193043)

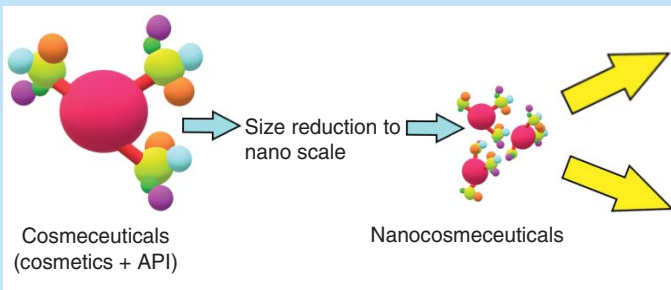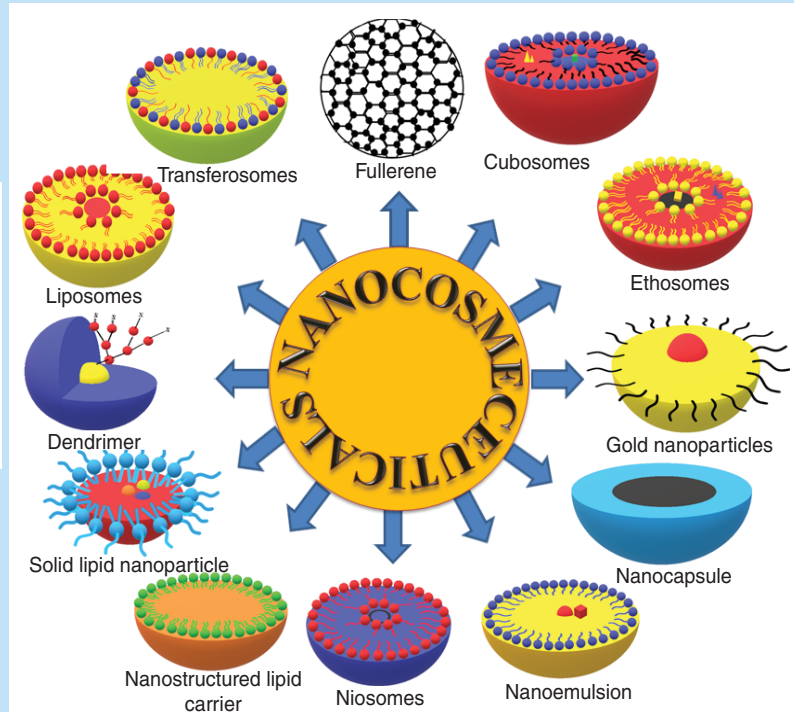

Supplement: Supplementary file 1 [file 24193043]
